# Supplementary material
Source: Royal Society of Chemistry journal article supplement (doi:10.1039/d6nr00271d)
Supplement: d6nr00271d1.pdf [file d6nr00271d1.pdf]

## Supplementary information

### Composition- and Structure-tunable CoNiFe Hydroxide Nanostructures toward Enhanced Oxygen Evolution Reaction

Zihan Zhang<sup>a,b</sup>, Xingxin Jiang<sup>a,b</sup>, Nattapol Ma<sup>c</sup>, Jizhen Zhang<sup>a</sup>, Emmanuel Picheau<sup>a</sup>, Nobuyuki Sakai<sup>a</sup>, Takayoshi Sasaki<sup>a</sup>, Renzhi Ma<sup>a,b,\*</sup>

<sup>a</sup>*Research Center for Materials Nanoarchitectonics (MANA), National Institute for Materials Science (NIMS), 1-1 Namiki, Tsukuba, Ibaraki 305-0044, Japan.*

<sup>b</sup>*Graduate School of Advanced Science and Engineering, Waseda University, 3-4-1 Okubo, Shinjuku-ku, Tokyo 169-8555, Japan*

<sup>c</sup>*International Center for Young Scientists (ICYS), National Institute for Materials Science (NIMS), 1-1 Namiki, Tsukuba, Ibaraki 305-0044, Japan.*

\* *Correspondence: MA.Renzhi@nims.go.jp (R. Ma)*

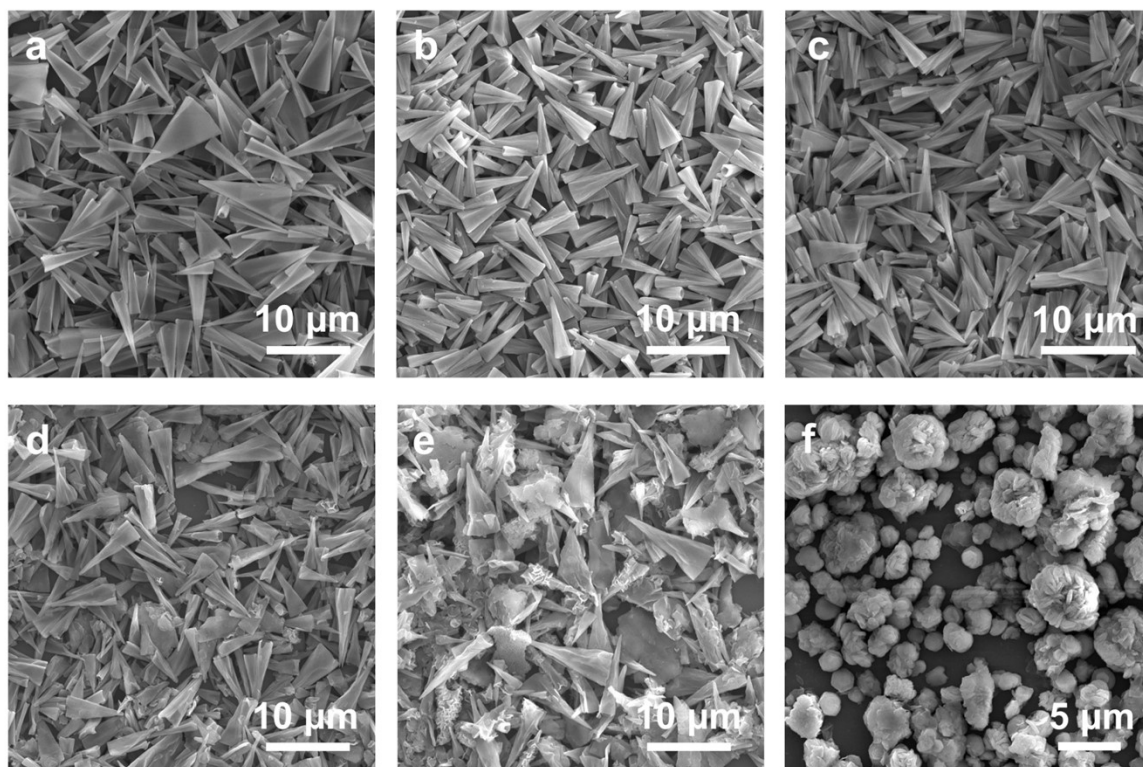

**Figure S1.** SEM images of (a)  $\text{Co}(\text{OH})_2$ , (b)  $\text{Co}_4\text{Ni}_1$  hydroxide, (c)  $\text{Co}_3\text{Ni}_1$  hydroxide, (d)  $\text{Co}_2\text{Ni}_1$  hydroxide, (e)  $\text{Co}_1\text{Ni}_1$  hydroxide, (f)  $\text{Ni}(\text{OH})_2$ .

**Table S1.** EDS results of CoNi hydroxide with different CoNi ratio (atomic %).

| Designed ratio | Actual ratio | Co   | Ni   |
|----------------|--------------|------|------|
| 4:1            | 4.1:1        | 32.3 | 7.9  |
| 3:1            | 3.0:1        | 26.3 | 8.9  |
| 2:1            | 1.9:1        | 18.8 | 9.7  |
| 1:1            | 1.0:1        | 15.3 | 15.9 |

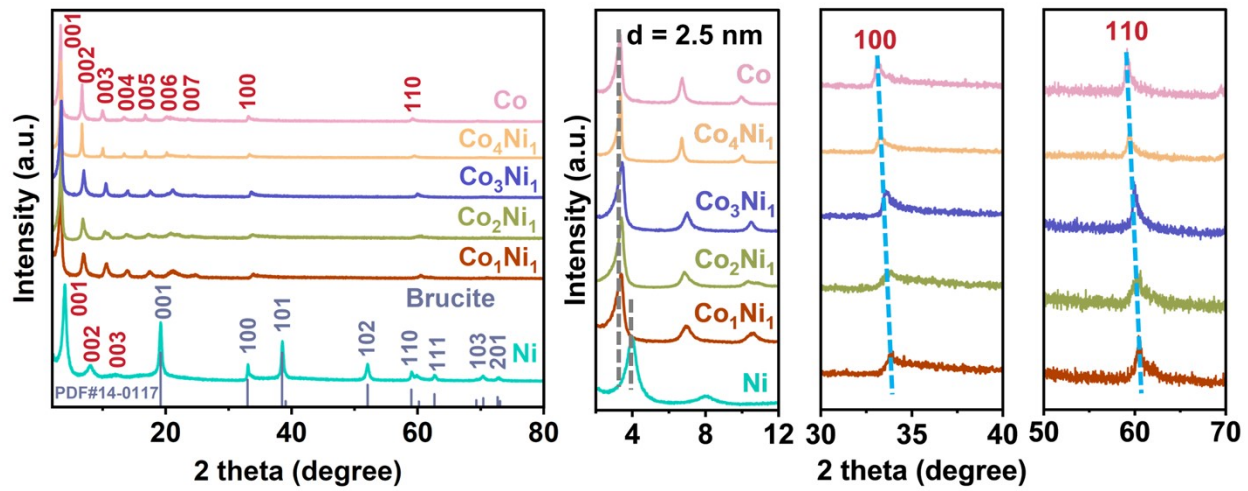

**Figure S2.** XRD patterns of  $\text{Co}(\text{OH})_2$ ,  $\text{Co}_4\text{Ni}_1$  hydroxide,  $\text{Co}_3\text{Ni}_1$  hydroxide,  $\text{Co}_2\text{Ni}_1$  hydroxide,  $\text{Co}_1\text{Ni}_1$  hydroxide, and  $\text{Ni}(\text{OH})_2$ .

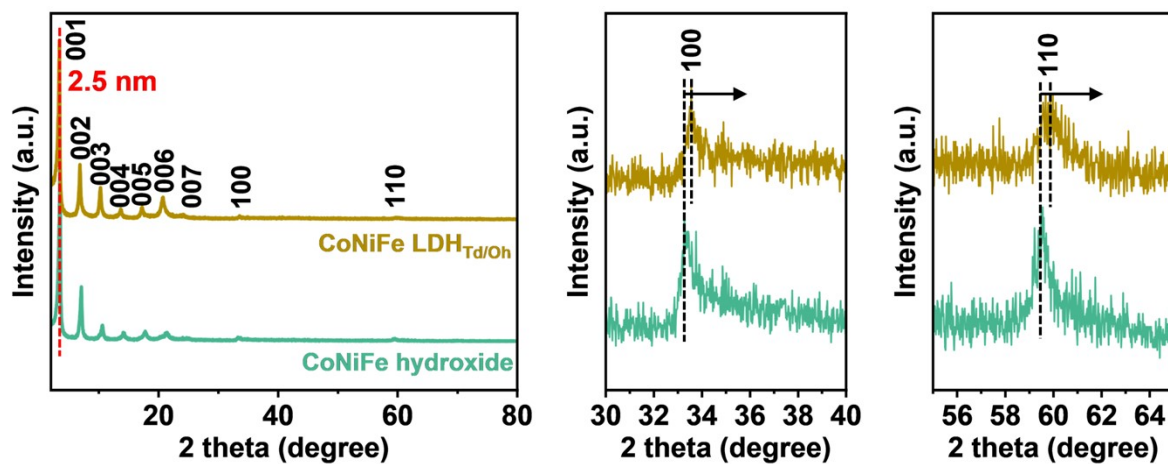

**Figure S3.** XRD patterns of  $\text{Co}_3\text{Ni}_1\text{Fe}_1$  hydroxide nanocones and  $\text{Co}_3\text{Ni}_1\text{Fe}_1$   $\text{LDH}_{\text{Td/Oh}}$  nanocones.

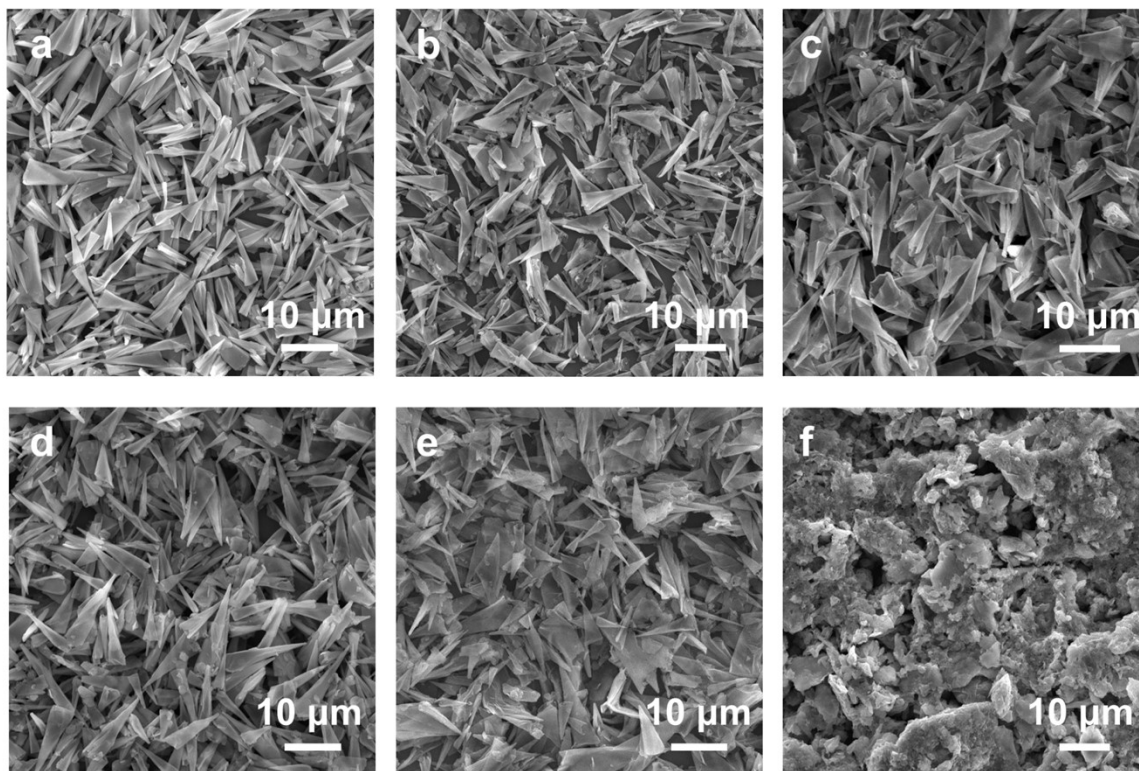

**Figure S4.** SEM images of CoNiFe LDH<sub>Td/Oh</sub> with different metal ratios: (a) Co<sub>8</sub>Ni<sub>1</sub>Fe<sub>1</sub>, (b) Co<sub>7</sub>Ni<sub>2</sub>Fe<sub>1</sub>, (c) Co<sub>7</sub>Ni<sub>2</sub>Fe<sub>2</sub>, (d) Co<sub>3</sub>Ni<sub>1</sub>Fe<sub>1</sub>, (e) Co<sub>7</sub>Ni<sub>1</sub>Fe<sub>2</sub>, and (f) Co<sub>6</sub>Ni<sub>1</sub>Fe<sub>3</sub>.

**Table S2.** EDS results of Fe-doped CoNi LDH<sub>Td/Oh</sub> with different CoNiFe ratio (atomic %).

| Designed ratio | Actual ratio     | Co   | Ni  | Fe  |
|----------------|------------------|------|-----|-----|
| 8:1:1          | 0.85: 0.10: 0.05 | 30.2 | 3.5 | 1.7 |
| 7:2:1          | 0.75: 0.21: 0.04 | 20.9 | 6.1 | 1.1 |
| 7:2:2          | 0.72: 0.18: 0.10 | 24.6 | 6.0 | 3.2 |
| 3:1:1          | 0.68: 0.23: 0.09 | 23.9 | 8.3 | 3.3 |
| 7:1:2          | 0.81: 0.09: 0.10 | 22.3 | 2.4 | 2.8 |
| 6:1:3          | 0.65: 0.11: 0.24 | 24.6 | 4.2 | 8.9 |

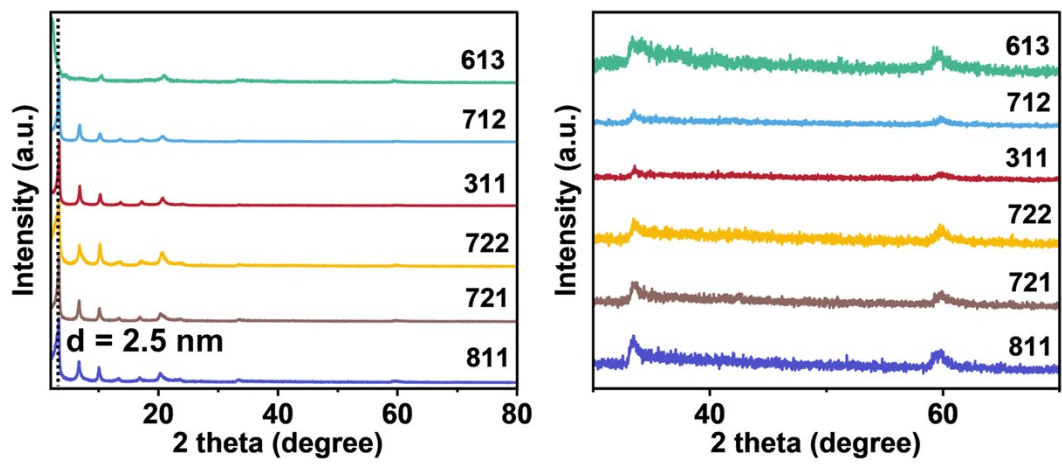

Figure S5. XRD patterns of CoNiFe LDH<sub>Td/Oh</sub> with different CoNiFe ratios.

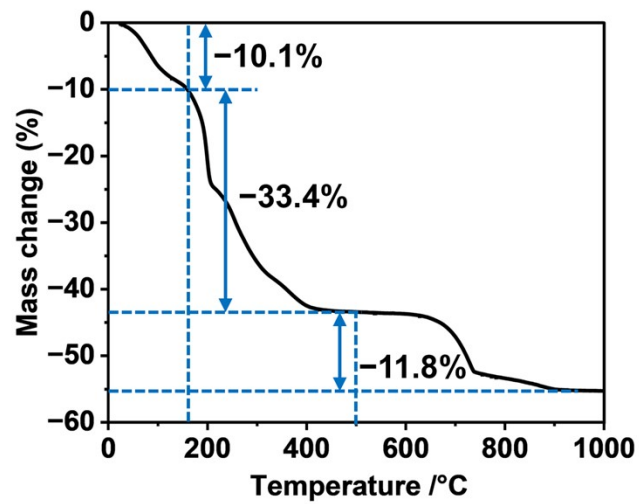

**Figure S6.** TG curve of LDH<sub>Td/Oh</sub> nanocones with a designed CoNiFe ratio of 3:1:1.

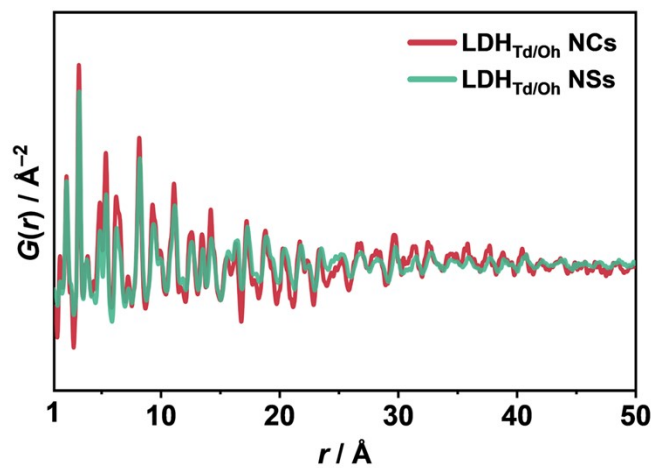

**Figure S7.** PDF patterns of CoNiFe LDH<sub>Td/Oh</sub> nanocones and nanosheets for high- $r$  range.

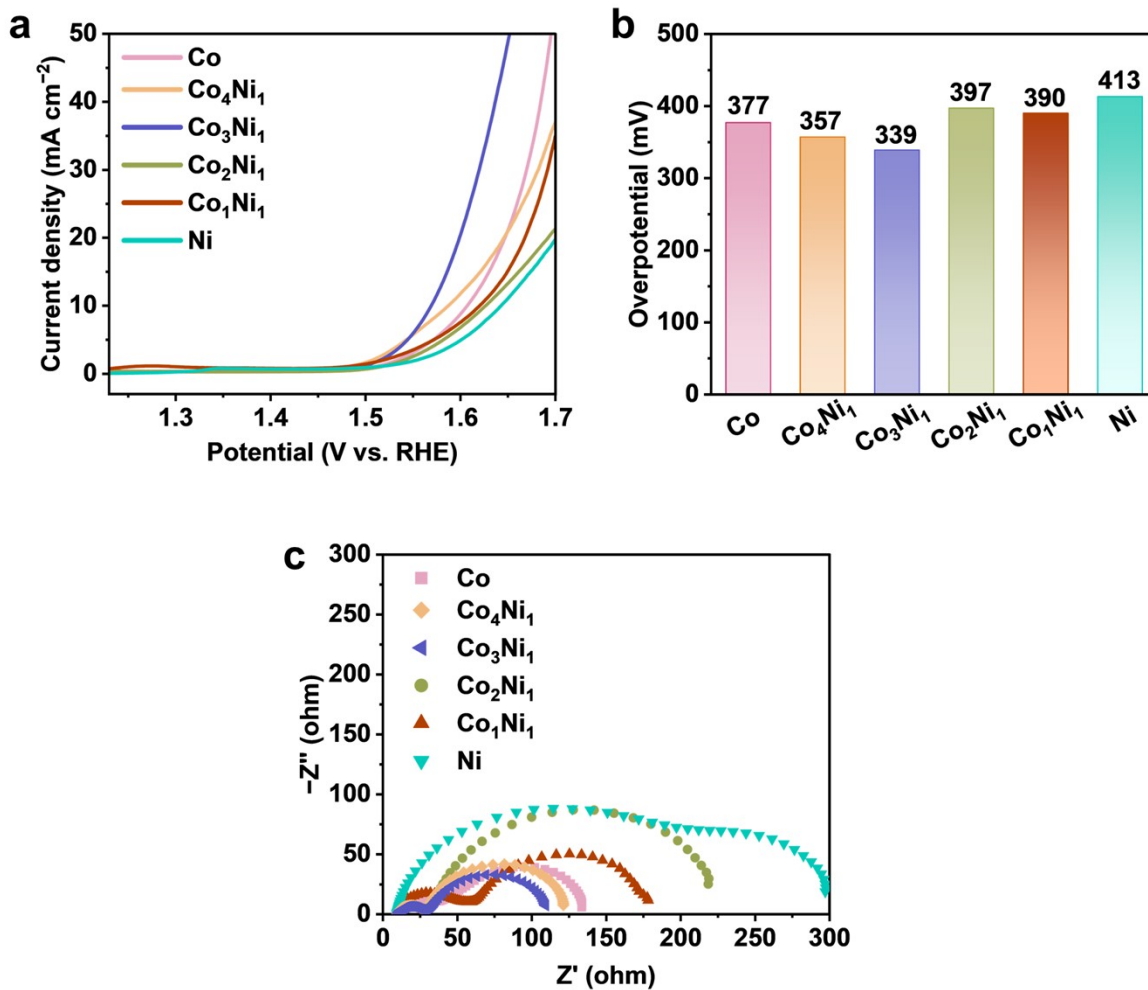

**Figure S8.** OER performance of CoNi hydroxide nanocones: (a) LSV curves, (b) overpotentials, and (c) Nyquist plots.

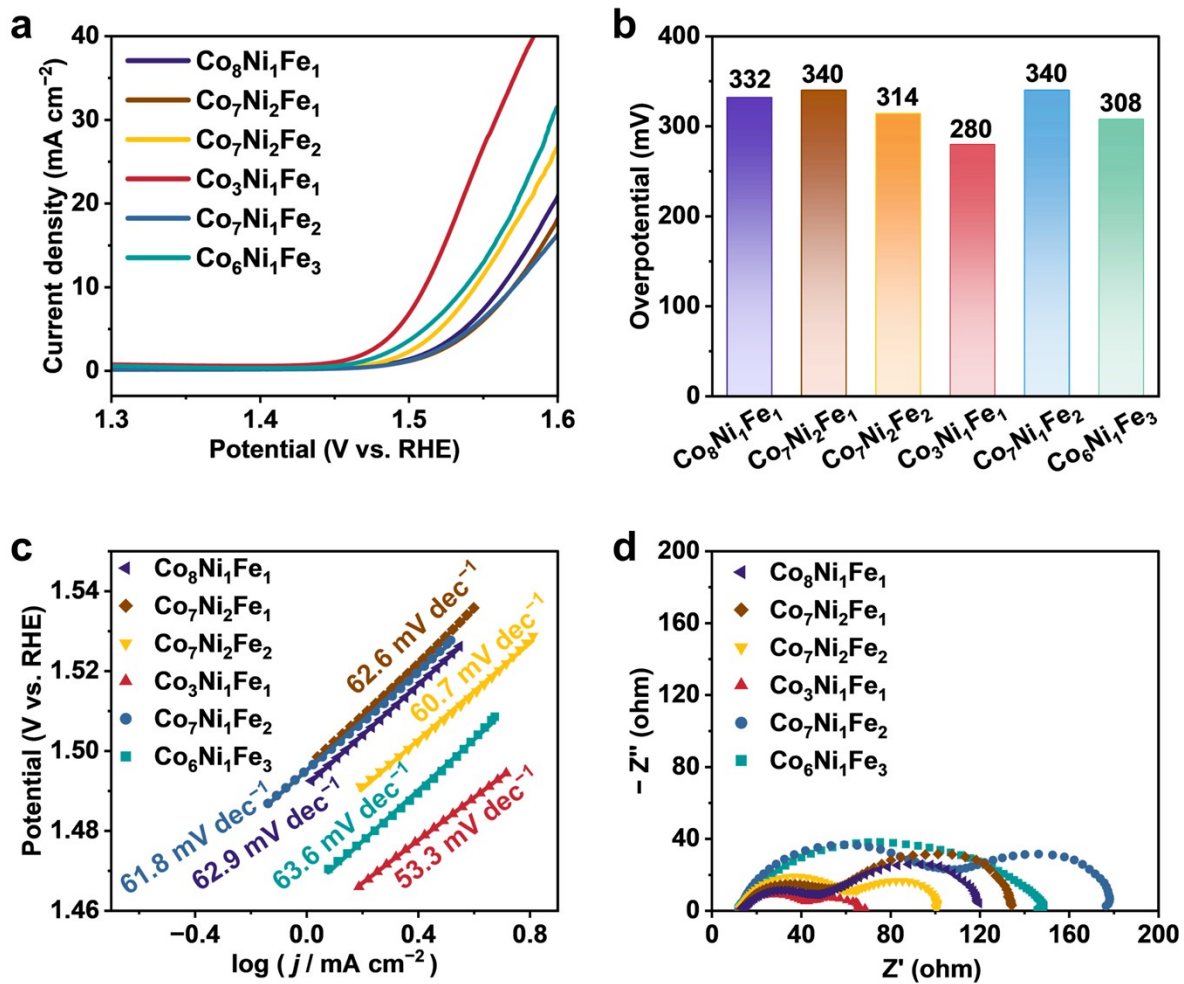

**Figure S9.** OER performance of CoNiFe LDH<sub>Td/Oh</sub> nanocones: (a) LSV curves, (b) overpotentials, (c) Tafel plots, and (d) Nyquist plots.

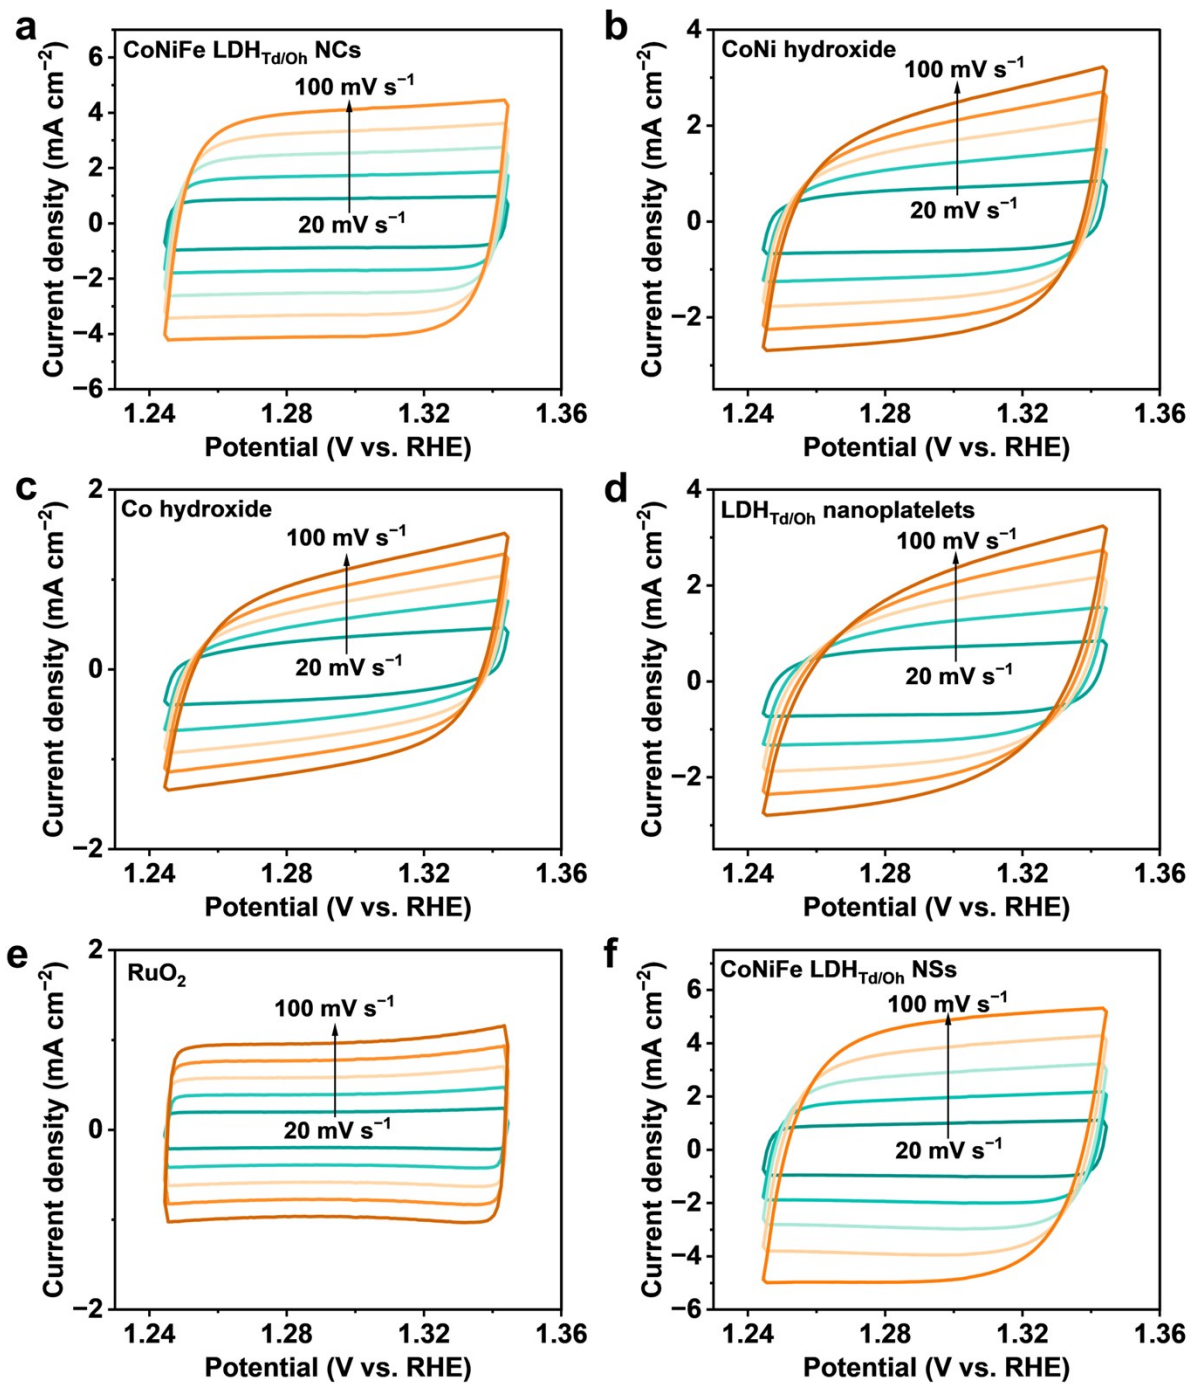

**Figure S10.** CV tests at different scan rates in a non-faradaic range to calculate the ECSA for (a) CoNiFe LDH<sub>Td/Oh</sub> NCs, (b) CoNi hydroxide NCs, (c) Co hydroxide NCs, (d) CoNiFe LDH<sub>Td/Oh</sub> nanoplatelets, (e) RuO<sub>2</sub>, and (f) CoNiFe LDH<sub>Td/Oh</sub> NSs.

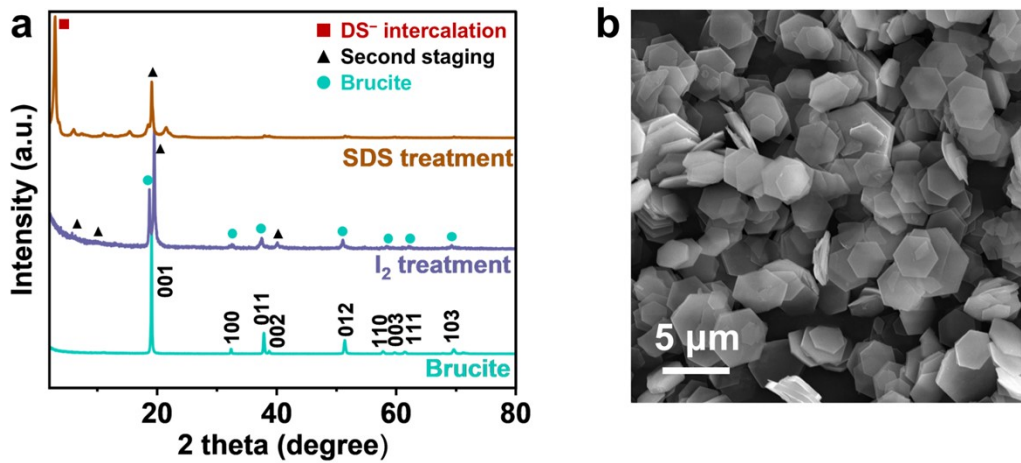

**Figure S11.** (a) XRD patterns of CoNiFe hydroxide nanoplatelets. (b) SEM image of CoNiFe LDH nanoplatelets with DS<sup>-</sup> intercalation.

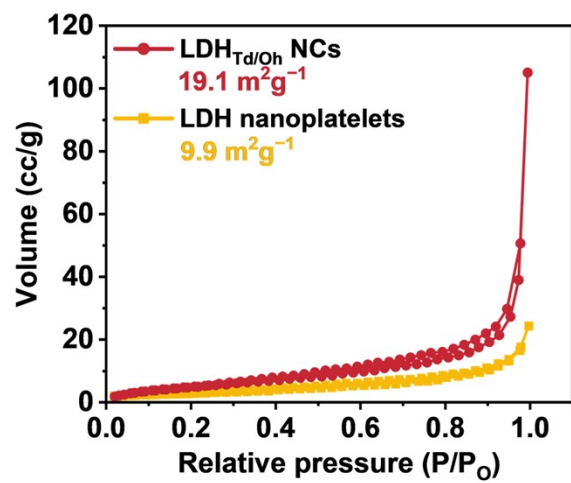

**Figure S12.** N<sub>2</sub> adsorption-desorption isotherms of CoNiFe LDH<sub>Td/Oh</sub> NCs and CoNiFe LDH nanoplatelets.

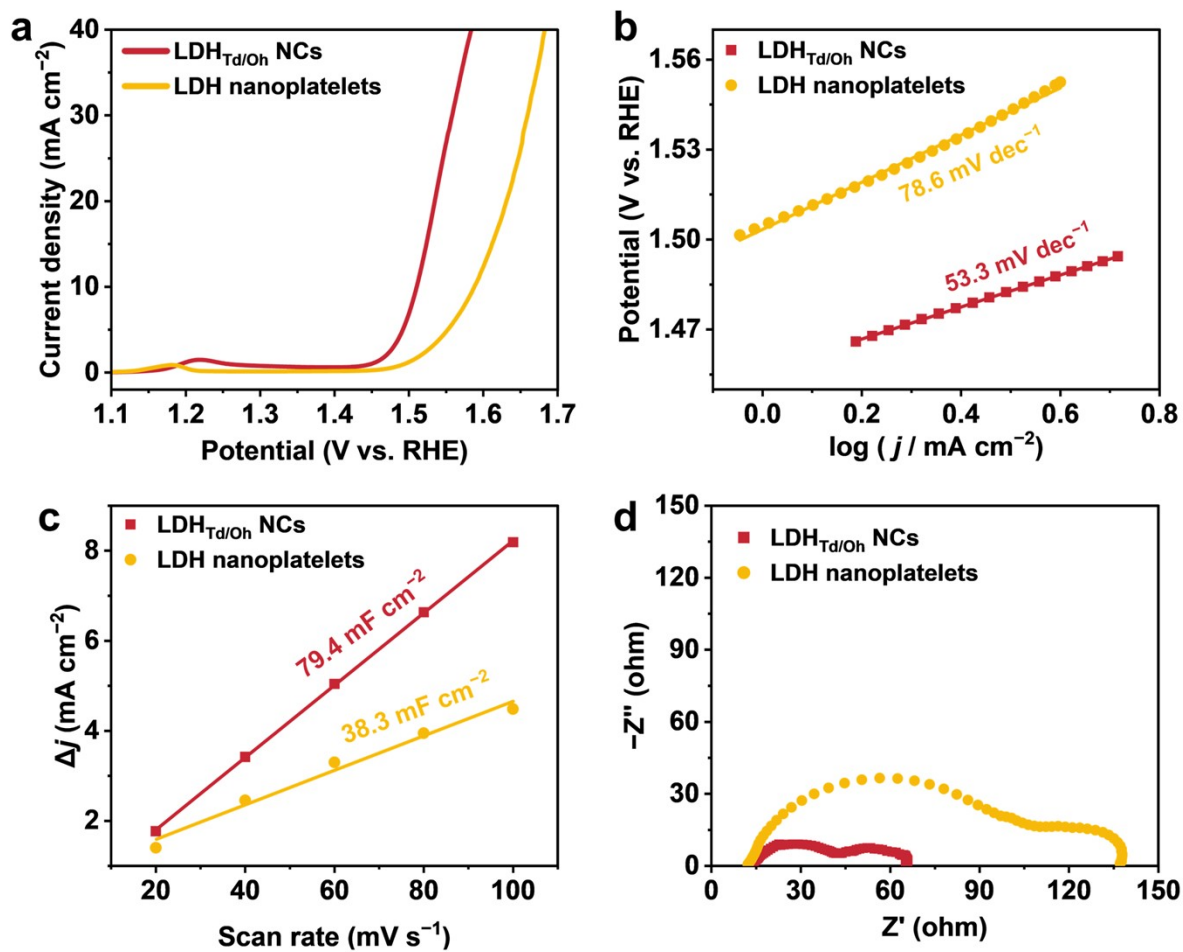

**Figure S13.** OER performance of CoNiFe LDH<sub>Td/Oh</sub> nanocones and CoNiFe LDH nanoplatelets: (a) LSV curves, (b) Tafel plots, (c) current density differences versus scan rates measured in non-faradaic range, and (d) Nyquist plots.

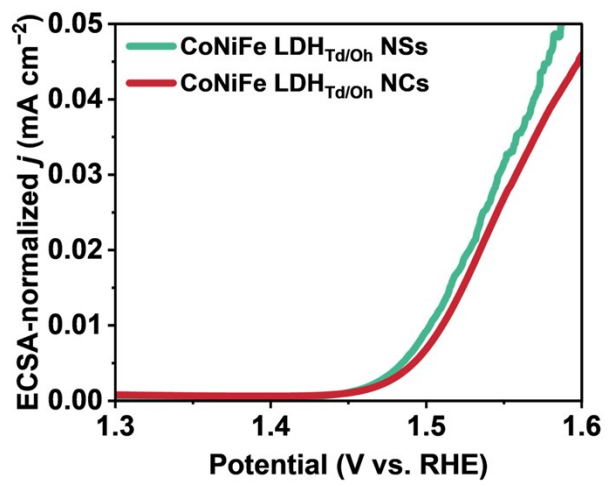

**Figure S14.** ECSA-normalized LSV curves of CoNiFe LDH<sub>Td/Oh</sub> NSs and CoNiFe LDH<sub>Td/Oh</sub> NCs.

**Table S3.** Comparison of OER performance of CoNiFe LDH<sub>Td/Oh</sub> NCs and recently reported non-precious OER catalysts in 1 M KOH.

| Electrocatalyst                           | $\eta_{10}$<br>(mV)                | Tafel slope<br>(mV dec <sup>-1</sup> ) | Stability<br>(h) | Reference        |
|-------------------------------------------|------------------------------------|----------------------------------------|------------------|------------------|
| <b>CoNiFe LDH<sub>Td/Oh</sub> NCs</b>     | <b>280</b><br><b>(267 for NSs)</b> | <b>53.3</b>                            | <b>40</b>        | <b>This work</b> |
| CoCo LDH                                  | 393                                | 59                                     | 12               | 1                |
| NiFe-LDH/SnS                              | 310                                | 53.6                                   | -                | 2                |
| S-Ni <sub>7</sub> Fe <sub>3</sub> LDH/TGF | 290                                | 87.84                                  | 11               | 3                |
| FeCo/LDH-NGCP                             | 299.6                              | 79.21                                  | -                | 4                |
| Co/NBC                                    | 302                                | 70                                     | 11               | 5                |
| CoP/NCNHP                                 | 310                                | 70                                     | 36               | 6                |
| Co <sub>1.8</sub> Ni-LDH                  | 290                                | 66                                     | 40               | 7                |
| 0.5NFLC                                   | 264                                | 67.8                                   | 50               | 8                |
| CoO/NiFe LDH                              | 290                                | 107                                    | 30               | 9                |
| NiFe(CN) <sub>5</sub> NO                  | 360                                | 122                                    | 30               | 10               |
| Ni(OH) <sub>2</sub> /GO                   | 380                                | 89.1                                   | 12               | 11               |
| NiFe (oxy)hydroxide                       | 268                                | 53.6                                   | 28               | 12               |
| NiFeCuS                                   | 327                                | 82.5                                   | -                | 13               |
| NiCo@mpNC                                 | 278                                | 95.2                                   | 20               | 14               |

## References

1. F. Song and X. Hu, *Nature Communications*, 2014, 5, 4477.
2. Y. Sun, Q. Cai, Z. Wang, Z. Li, Q. Zhou, X. Li, D. Zhao, J. Lu, S. Tian, Y. Li and S. Wang, *ACS Applied Materials & Interfaces*, 2024, 16, 23054-23060.
3. D. Li, M. U. Mushtaq, Y. Tang, S. Li, F. Hou, K. S. Ayub, L. Cao and J. Yang, *Research on Chemical Intermediates*, 2025, 51, 3019-3038.
4. F. Zhang, Y. Lei, G. Li, Y. Xie, X. Guo, X. Zhang and X. Wang, *ChemSusChem*, 2025, 18, e202401556.
5. M.-R. Liu, Q.-L. Hong, Q.-H. Li, Y. Du, H.-X. Zhang, S. Chen, T. Zhou and J. Zhang, *Advanced Functional Materials*, 2018, 28.
6. Y. Pan, K. Sun, S. Liu, X. Cao, K. Wu, W. C. Cheong, Z. Chen, Y. Wang, Y. Li, Y. Liu, D. Wang, Q. Peng, C. Chen and Y. Li, *J Am Chem Soc*, 2018, 140, 2610-2618.
7. W. Hu, Q. Liu, T. Lv, F. Zhou and Y. Zhong, *Electrochimica Acta*, 2021, 381, 138276.
8. S. Zhang, L. Liu, M. Shi, Z. Ma, R. Zhao and J. Du, *International Journal of Hydrogen Energy*, 2025, 190, 152234.
9. T. Du, Y. Gao, Z. Liu, T. Chen, X. Zhang and F. Yang, *International Journal of Hydrogen Energy*, 2024, 51, 907-915.
10. Y. Zhang, X. Shen, C. Song, Z. Ji and F.-H. Du, *Journal of Materials Chemistry A*, 2023, 11, 8904-8911.
11. S. Upadhyay, R. A. Mir and O. P. Pandey, *International Journal of Hydrogen Energy*, 2023, 48, 36687-36693.
12. B. Feng, Y. Hao, J. Chen, H. Wang, C. Zhong, Y. Yang and Y. Yao, *Applied Surface Science*, 2023, 622, 156934.
13. F. N. I. Sari, Y.-C. Lai, Y.-J. Huang, X.-Y. Wei, H. Pourzolfaghar, Y.-H. Chang, M. Ghufron, Y.-Y. Li, Y.-H. Su, O. Clemens and J.-M. Ting, *Advanced Functional Materials*, 2024, 34, 2310181.
14. X. Zeng, H. Zhang and R. Yu, *Journal of Alloys and Compounds*, 2023, 960, 170950.
